# Supplementary material
Source: Springer Nature journal article supplement (https://www.springermedizin.de/resource/supplementary/12885_2011_2900_MOESM5_ESM.pdf/9462250)

peptide

| p-values      |               |
|---------------|---------------|
| <i>T-test</i> | <i>U-test</i> |
| 0,309         | 1             |
| 0,095         |               |
| <0,001        |               |
| 0,235         |               |
| <0,001        |               |
| <0,001        |               |
| 0,570         | 1             |
| 0,654         |               |
| 0,461         |               |
| 0,054         |               |
|               | 0,002         |

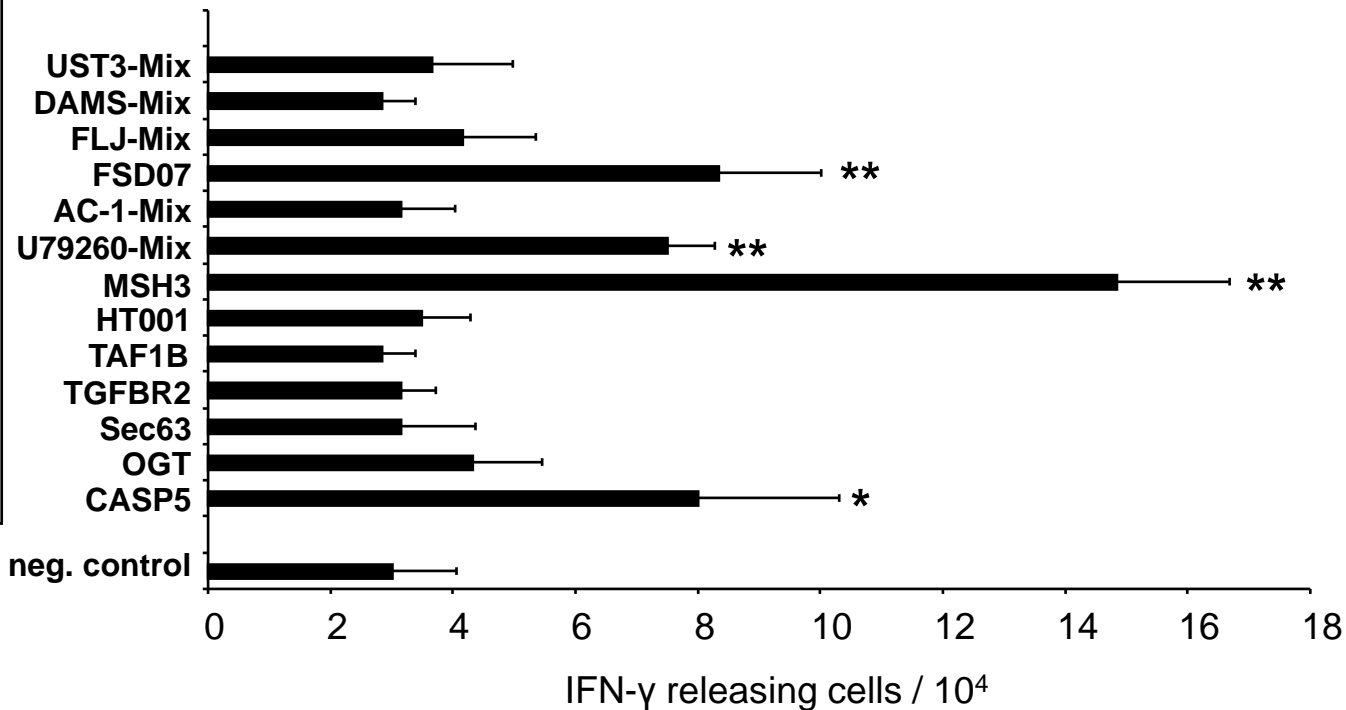

Supplement: MOESM5 [file 9462250]
